# Supplementary material for: Flux Imbalance Analysis and the Sensitivity of Cellular Growth to Changes in Metabolite Pools
Source: PLoS Comput Biol. 2013 Aug 29;9(8):e1003195. doi: 10.1371/journal.pcbi.1003195 (PMC3757068; doi:10.1371/journal.pcbi.1003195)
Supplement: Dataset S1 — Supporting Data. Contains data associated with the figures. (XLSX) [file pcbi.1003195.s001.xlsx]

## Sheet: Figure 2
				Only Uses Cytoplasmic Metabolites				All Non-Transport Metabolites
Type of Limitation	Nutrient Name	Normalized Shadow Price (Normalized to maximum shadow price for condition)	Shadow Price	Growth Limitation	Metabolite Index			Type of Limitation	Nutrient Name	Normalized Shadow Price (Normalized to maximum shadow price for condition)	Shadow Price	Growth Limitation	Metabolite Index
Glucose	Pyruvate	-0.172297	-0.0368	0.844599	1023			Glucose	Pyruvate	-0.252401	-0.0368	0.844599	1023
	Dihydroxyacetone-Phosphate	-0.257	-0.0549	0.69258	436				Pyruvate	-0.262689	-0.0383	0.844599	1025
	Threonine	-0.344595	-0.0736	0.700086	1110				Pyruvate	-0.183128	-0.0267	0.844599	1026
	Arginine	-0.5641	-0.1205	1.16	291				Dihydroxyacetone-Phosphate	-0.376543	-0.0549	0.69258	436
	N-acetyl-glucosamine-1-phosphate	-0.6825	-0.1458	0.966	219				Dihydroxyacetone-Phosphate	-0.376543	-0.0549	0.69258	437
	Glutamate	-0.347973	-0.0743	-0.470376	578				Threonine	-0.504801	-0.0736	0.700086	1110
	NAD+	0	0	-0.567255	841				Threonine	-0.515089	-0.0751	0.700086	1112
Ammonium	Glutamine	-0.4	-0.3576	1.79391	569				Arginine	-0.826475	-0.1205	1.16	291
	Arginine	-0.8	-0.7152	1.86746	291				Arginine	-0.836763	-0.122	1.16	293
	Serine	-0.2	-0.1788	1.403	1052				N-acetyl-glucosamine-1-phosphate	-1	-0.1458	0.966	219
	Ornithine	-0.4	-0.3576	1.36776	906				Glutamate	-0.509602	-0.0743	-0.470376	578
	Leucine/isoleucine	-0.2	-0.1788	1.17486	710				Glutamate	-0.509602	-0.0743	-0.470376	580
	Tryptophan	-0.4	-0.3576	1.11966	1166				Glutamate	-0.509602	-0.0743	-0.470376	583
	Histidine	-0.6	-0.5364	1.78483	673				NAD+	0	0	-0.567255	844
	Lysine	-0.4	-0.3576	1.00845	764				NAD+	0	0	-0.567255	840
	Alanine	-0.2	-0.1788	0.919385	257				NAD+	0	0	-0.567255	841
	Phenylpyruvate	0	0	-0.818416	957			Ammonium	Glutamine	-0.5	-0.3576	1.79391	569
	Trehalose	0	0	-1.39719	1128				Arginine	-1	-0.7152	1.86746	291
	Sucrose	0	0	-1.39719	1082				Arginine	-1	-0.7152	1.86746	293
Phosphate	ATP	-1	-15.1745	0.699762	314				Serine	-0.25	-0.1788	1.403	1052
	Ribose-phosphate	-0.333333	-5.0582	2.03559	1031				Serine	-0.25	-0.1788	1.403	1054
	D-sedoheptulose-7-phosphate	-0.333333	-5.0582	1.47006	1043				Ornithine	-0.5	-0.3576	1.36776	906
	6-phospho-d-gluconate	-0.333333	-5.0582	2.32575	171				Ornithine	-0.5	-0.3576	1.36776	908
	NAD+	0	0	0.38	841				Leucine/isoleucine	-0.25	-0.1788	1.17486	710
	Fructose-1,6-bisphosphate	-0.666667	-10.1163	2.59091	510				Leucine/isoleucine	-0.25	-0.1788	1.17486	754
	UDP-D-glucose	-0.666667	-10.1163	0.772454	1191				Leucine/isoleucine	-0.25	-0.1788	1.17486	756
	N-acetyl-glucosamine-1-phosphate	-0.333	-5.0582	1.54	219				Leucine/isoleucine	-0.25	-0.1788	1.17486	712
	CTP	-1	-15.1745	0.718713	388				Tryptophan	-0.5	-0.3576	1.11966	1166
	UTP	-1	-15.1745	1.12648	1205				Tryptophan	-0.5	-0.3576	1.11966	1168
	Choline	0	0	-1.89589	354				Histidine	-0.75	-0.5364	1.78483	673
	Deoxyguanosine	0	0	-1.31897	432				Histidine	-0.75	-0.5364	1.78483	675
	Cytosine	0	0	-1.84907	386				Lysine	-0.5	-0.3576	1.00845	764
	Guanosine	0	0	-2.111	606				Lysine	-0.5	-0.3576	1.00845	766
	Adenosine	0	0	-1.38674	235				Alanine	-0.25	-0.1788	0.919385	257
	Cytidine	-2.34124e-16	0	-1.8352	395				Alanine	-0.25	-0.1788	0.919385	259
	Inosine	0	0	-2.7479	727				Phenylpyruvate	0	0	-0.818416	957
Leucine	Nicotinate	0	0	1.21621	837				Trehalose	0	0	-1.39719	1128
	Pyruvate	0	0	-0.486558	1023				Trehalose	0	0	-1.39719	1130
	Phenylpyruvate	0	0	-1.40851	957				Sucrose	0	0	-1.39719	1082
	Choline	0	0	-2.09654	354			Phosphate	ATP	-1	-15.1745	0.699762	314
Uracil	UTP	-1	-9.0416	1.18058	1205				ATP	-1	-15.1745	0.699762	316
	CTP	-1	-9.0416	0.737528	388				ATP	0	0	0.699762	317
	Serine	0	0	0.73899	1052				ATP	0	0	0.699762	318
									ATP	0	0	0.699762	319
									ATP	0	0	0.699762	320
									Ribose-phosphate	-0.333336	-5.0582	2.03559	1031
									Ribose-phosphate	-0.333336	-5.0582	2.03559	1032
									D-sedoheptulose-7-phosphate	-0.333336	-5.0582	1.47006	1043
									6-phospho-d-gluconate	-0.333336	-5.0582	2.32575	171
									NAD+	0	0	0.38	841
									NAD+	0	0	0.38	844
									Fructose-1,6-bisphosphate	-0.666664	-10.1163	2.59091	510
									UDP-D-glucose	-0.666664	-10.1163	0.772454	1191
									N-acetyl-glucosamine-1-phosphate	-0.333336	-5.0582	1.54	219
									CTP	-1	-15.1745	0.718713	388
									CTP	-0.666664	-10.1163	0.718713	389
									UTP	-1	-15.1745	1.12648	1205
									UTP	0	0	1.12648	1206
									Choline	0	0	-1.89589	354
									Deoxyguanosine	0	0	-1.31897	432
									Cytosine	0	0	-1.84907	386
									Guanosine	0	0	-2.111	606
									Guanosine	0	0	-2.111	608
									Adenosine	0	0	-1.38674	235
									Adenosine	0	0	-1.38674	237
									Cytidine	0	0	-1.8352	395
									Inosine	0	0	-2.7479	727
								Leucine	Nicotinate	0	0	1.21621	837
									Nicotinate	0	0	1.21621	839
									Pyruvate	0	0	-0.486558	1023
									Pyruvate	0	0	-0.486558	1025
									Pyruvate	0	0	-0.486558	1026
									Phenylpyruvate	0	0	-1.40851	957
									Choline	0	0	-2.09654	354
								Uracil	UTP	-1	-9.0416	1.18058	1205
									CTP	-1	-9.0416	0.737528	388
									CTP	0	0	0.737528	389
									Serine	0	0	0.73899	1052
									Serine	0	0	0.73899	1054

## Sheet: Figure 3
Nitrogen Upshift					Glucose Starvation					Acetate Limitation						Succinate Limitation						Glycerol Starvation
Metabolite Index	Metabolite Name	Shadow Price	CV		Metabolite Index	Metabolite Name	Shadow Price	CV		Metabolite Index	Metabolite Name	Shadow Price	CV			Metabolite Index	Metabolite Name	Shadow Price	CV			Metabolite Index	Metabolite Name	Shadow Price	CV
26	'2,3-Dihydroxybenzoate'	-0.123903	0.580637		26	'2,3-Dihydroxybenzoate'	-0.123912	0.209549		73	'2-Isopropylmaleate'	-0.108182	1.4002			73	'2-Isopropylmaleate'	-0.110072	0.487755			73	'2-Isopropylmaleate'	-0.118094	0.408839
155	'3-Phospho-D-glycerate'	-0.0447716	0.269978		73	'2-Isopropylmaleate'	-0.117841	0.498825		231	'N2-Acetyl-L-ornithine'	-0.116667	0.634084			214	'Acetyl-CoA'	-0.497668	0.868058			231	'N2-Acetyl-L-ornithine'	-0.126683	1.30718
195	'6-Phospho-D-gluconate'	-0.0978729	0.123602		214	'Acetyl-CoA'	-0.482435	0.598618		240	'ADP'	-0.171641	0.343781			231	'N2-Acetyl-L-ornithine'	-0.114756	1.43641			240	'ADP'	-0.183403	0.342127
214	'Acetyl-CoA'	-0.488323	0.153259		231	'N2-Acetyl-L-ornithine'	-0.126412	0.885867		252	'2-Oxoglutarate'	-0.050909	0.92338			240	'ADP'	-0.165694	0.328449			252	'2-Oxoglutarate'	-0.0687092	0.109995
228	'cis-Aconitate'	-0.0770489	0.361824		240	'ADP'	-0.183011	0.600882		268	'AMP'	-0.156793	0.251677			252	'2-Oxoglutarate'	-0.0515232	0.20583			268	'AMP'	-0.179109	0.239216
229	'trans-Aconitate'	-0.0770489	0.361824		252	'2-Oxoglutarate'	-0.0685622	0.106861		298	'L-Asparagine'	-0.0413636	0.318267			268	'AMP'	-0.151642	0.236237			298	'L-Asparagine'	-0.0568998	0.175303
235	'Adenine'	-0.0858991	0.266308		268	'AMP'	-0.178726	0.68666		302	'L-Aspartate'	-0.0371212	0.113786			298	'L-Asparagine'	-0.0386424	0.546782			302	'L-Aspartate'	-0.0526055	0.464892
240	'ADP'	-0.182731	0.15518		298	'L-Asparagine'	-0.0567781	0.194654		307	'ATP'	-0.18649	0.0565902			302	'L-Aspartate'	-0.0339585	0.434629			307	'ATP'	-0.187698	0.0877434
254	'D-Alanine'	-0.0478952	0.336477		302	'L-Aspartate'	-0.0524929	0.418926		337	'CDP'	-0.160505	0.214807			307	'ATP'	-0.179746	0.0540709			337	'CDP'	-0.160321	0.196523
255	'L-Alanine'	-0.0478952	0.336477		307	'ATP'	-0.187296	0.394776		352	'Citrate'	-0.050909	1.44166			337	'CDP'	-0.15457	0.312127			352	'Citrate'	-0.0772978	0.0973539
268	'AMP'	-0.178566	0.245112		337	'CDP'	-0.159978	0.0944355		353	'L-Citrulline'	-0.0827272	0.689174			352	'Citrate'	-0.0515232	0.329335			353	'L-Citrulline'	-0.105211	0.987901
294	'L-Arginine'	-0.111409	0.248641		352	'Citrate'	-0.0771324	0.820154		356	'CMP'	-0.145656	0.328156			353	'L-Citrulline'	-0.0819688	0.913034			356	'CMP'	-0.156027	0.265774
298	'L-Asparagine'	-0.0572661	0.354589		353	'L-Citrulline'	-0.104986	1.10813		377	'CTP'	-0.175353	0.559028			356	'CMP'	-0.140518	0.270618			377	'CTP'	-0.164616	0.221577
302	'L-Aspartate'	-0.0531013	0.633384		356	'CMP'	-0.155693	0.163759		327	'cAMP'	-0.170581	0.910124			377	'CTP'	-0.168622	0.540523			327	'cAMP'	-0.18233	0.700771
307	'ATP'	-0.186896	0.0670355		377	'CTP'	-0.164264	0.506406		392	'dATP'	-0.196035	0.432551			327	'cAMP'	-0.164523	0.912371			392	'dATP'	-0.195213	0.339898
328	'N-Carbamoyl-L-aspartate'	-0.0593485	0.218173		327	'cAMP'	-0.18194	0.969789		399	'dCDP'	-0.17005	0.393654			392	'dATP'	-0.187943	0.45931			399	'dCDP'	-0.167836	0.397095
392	'dATP'	-0.194184	0.15546		392	'dATP'	-0.194795	0.0849741		401	'dCTP'	-0.184899	0.288051			399	'dCDP'	-0.162767	0.413432			401	'dCTP'	-0.172131	0.34293
401	'dCTP'	-0.170757	0.184318		399	'dCDP'	-0.167477	0.383735		443	'dTDP'	-0.207702	0.450329			401	'dCTP'	-0.176818	0.327082			443	'dTDP'	-0.187698	0.308449
414	'Dihydroxyacetone phosphate'	-0.0551837	0.144941		401	'dCTP'	-0.171763	0.0807091		451	'dTTP'	-0.22255	0.598619			443	'dTDP'	-0.193798	0.347976			451	'dTTP'	-0.191992	0.252462
422	'(S)-Dihydroorotate'	-0.0583073	0.385811		443	'dTDP'	-0.187296	0.47108		473	'D-Fructose 1,6-bisphosphate'	-0.127273	1.31589			451	'dTTP'	-0.207849	0.584977			473	'D-Fructose 1,6-bisphosphate'	-0.111652	1.10019
458	'D-Erythrose 4-phosphate'	-0.0718429	0.235206		451	'dTTP'	-0.191581	0.442245		500	'Fumarate'	-0.035	0.25718			473	'D-Fructose 1,6-bisphosphate'	-0.121782	1.11782			500	'Fumarate'	-0.0526055	0.303369
473	'D-Fructose 1,6-bisphosphate'	-0.110367	0.146866		473	'D-Fructose 1,6-bisphosphate'	-0.111414	1.15837		523	'GDP'	-0.166338	0.138514			500	'Fumarate'	-0.0339585	0.254282			523	'GDP'	-0.180183	0.112335
196	'6-phospho-D-glucono-1,5-lactone'	-0.0968317	0.177661		500	'Fumarate'	-0.0524929	0.591673		517	'D-Glucosamine 1-phosphate'	-0.130454	0.386286			523	'GDP'	-0.162181	0.161593			517	'D-Glucosamine 1-phosphate'	-0.110579	0.309146
573	'Reduced glutathione'	-0.204596	0.12483		523	'GDP'	-0.179797	0.176557		544	'L-Glutamate'	-0.0604545	0.315138			517	'D-Glucosamine 1-phosphate'	-0.125295	0.164636			544	'L-Glutamate'	-0.0762242	0.187463
572	'Oxidized glutathione'	-0.400862	0.0900007		517	'D-Glucosamine 1-phosphate'	-0.110342	0.289687		541	'L-Glutamine'	-0.0646969	0.496877			544	'L-Glutamate'	-0.0597201	0.168392			541	'L-Glutamine'	-0.0805186	0.648311
551	'Glycine'	-0.0265506	0.532217		544	'L-Glutamate'	-0.0760612	0.140525		557	'Glycerol 3-phosphate'	-0.0731817	0.547709			541	'L-Glutamine'	-0.0644041	0.330685			557	'Glycerol 3-phosphate'	-0.0633413	1.04644
467	'D-Fructose 6-phosphate'	-0.105161	0.0924266		541	'L-Glutamine'	-0.0803463	0.639056		565	'GMP'	-0.15149	0.22818			557	'Glycerol 3-phosphate'	-0.069088	0.350586			565	'GMP'	-0.175888	0.200287
501	'D-Glucose 1-phosphate'	-0.105161	0.0924266		573	'Reduced glutathione'	-0.200866	0.281674		574	'GTP'	-0.181187	0.0294444			565	'GMP'	-0.148129	0.271219			574	'GTP'	-0.184477	0.0838214
508	'D-Glucose 6-phosphate'	-0.105161	0.0924266		572	'Oxidized glutathione'	-0.394233	0.281674		584	'L-Homocysteine'	-0.160151	0.298822			574	'GTP'	-0.176233	0.058059			584	'L-Homocysteine'	-0.125609	0.350437
597	'L-Histidine'	-0.111929	0.618326		557	'Glycerol 3-phosphate'	-0.0632058	0.184905		169	'4-Hydroxybenzoate'	-0.147071	0.253581			584	'L-Homocysteine'	-0.141689	0.5123			169	'4-Hydroxybenzoate'	-0.131693	0.352585
621	'L-Isoleucine'	-0.132233	0.559741		565	'GMP'	-0.175512	0.443136		624	'IMP'	-0.159975	0.903988			169	'4-Hydroxybenzoate'	-0.135834	0.217781			624	'IMP'	-0.173741	0.787016
661	'L-Lysine'	-0.123903	0.317441		574	'GTP'	-0.184082	0.437147		665	'L-Malate'	-0.035	0.201922			624	'IMP'	-0.155155	0.829615			665	'L-Malate'	-0.0526055	0.27079
686	'L-Methionine'	-0.156701	0.372458		584	'L-Homocysteine'	-0.12534	0.105569		686	'L-Methionine'	-0.190379	0.103846			665	'L-Malate'	-0.0339585	0.232092			686	'L-Methionine'	-0.150838	0.382527
720	'Nicotinamide adenine dinucleotide'	-0.376394	0.0767822		169	'4-Hydroxybenzoate'	-0.131411	0.263574		222	'N-Acetyl-L-glutamate'	-0.0837878	0.958909			686	'L-Methionine'	-0.169207	0.340486			222	'N-Acetyl-L-glutamate'	-0.108432	0.767141
722	'Nicotinamide adenine dinucleotide phosphate'	-0.3816	0.0976678		624	'IMP'	-0.173369	0.989787		720	'Nicotinamide adenine dinucleotide'	-0.395782	0.224856			222	'N-Acetyl-L-glutamate'	-0.0854817	0.941489			720	'Nicotinamide adenine dinucleotide'	-0.378079	0.205102
723	'Nicotinamide adenine dinucleotide phosphate - reduced'	-0.390971	0.101751		665	'L-Malate'	-0.0524929	0.570854		721	'Nicotinamide adenine dinucleotide - reduced'	-0.393661	0.14056			720	'Nicotinamide adenine dinucleotide'	-0.376471	0.213684			721	'Nicotinamide adenine dinucleotide - reduced'	-0.386668	0.181474
755	'Orotate'	-0.0541425	0.284325		686	'L-Methionine'	-0.150515	0.46294		722	'Nicotinamide adenine dinucleotide phosphate'	-0.401085	0.25372			721	'Nicotinamide adenine dinucleotide - reduced'	-0.376471	0.139501			722	'Nicotinamide adenine dinucleotide phosphate'	-0.383447	0.137526
860	'alpha-D-Ribose 5-phosphate'	-0.0885021	0.0675032		222	'N-Acetyl-L-glutamate'	-0.1082	0.764743		328	'N-Carbamoyl-L-aspartate'	-0.0222727	1.34986			722	'Nicotinamide adenine dinucleotide phosphate'	-0.382326	0.136386			328	'N-Carbamoyl-L-aspartate'	-0.0590469	0.943516
1034	'D-Xylulose 5-phosphate'	-0.0885021	0.0675032		720	'Nicotinamide adenine dinucleotide'	-0.377271	0.144088		754	'Ornithine'	-0.0975757	0.734909			328	'N-Carbamoyl-L-aspartate'	-0.0222487	1.08416			754	'Ornithine'	-0.0987694	1.10354
800	'L-Phenylalanine'	-0.178045	0.524222		721	'Nicotinamide adenine dinucleotide - reduced'	-0.385841	0.17248		755	'Orotate'	-0.0275757	0.914755			754	'Ornithine'	-0.0936786	1.17345			755	'Orotate'	-0.053679	0.611052
806	'Phenylpyruvate'	-0.169716	0.847831		722	'Nicotinamide adenine dinucleotide phosphate'	-0.382627	0.0965253		800	'L-Phenylalanine'	-0.19904	0.632042			755	'Orotate'	-0.0257616	0.585909			800	'L-Phenylalanine'	-0.177857	0.341938
784	'Phosphoenolpyruvate'	-0.0447716	0.148544		328	'N-Carbamoyl-L-aspartate'	-0.0589206	0.97065		784	'Phosphoenolpyruvate'	-0.0424242	0.73403			812	'(R)-Pantothenate'	-0.158668	1.02842			784	'Phosphoenolpyruvate'	-0.0450904	0.659192
834	'L-Proline'	-0.0957905	0.257106		754	'Ornithine'	-0.0985581	0.950895		834	'L-Proline'	-0.0933332	0.247951			800	'L-Phenylalanine'	-0.186186	0.30466			834	'L-Proline'	-0.0944751	0.578715
862	'Reduced riboflavin'	-0.349844	0.315282		755	'Orotate'	-0.0535642	0.122386		853	'Pyruvate'	-0.0328788	0.593442			784	'Phosphoenolpyruvate'	-0.0398134	0.690986			853	'Pyruvate'	-0.0397225	0.277302
265	'S-Adenosyl-L-methionine'	-0.337349	0.626884		812	'(R)-Pantothenate'	-0.166585	0.990569		874	'Sedoheptulose 1,7-bisphosphate'	-0.148131	1.08136			834	'L-Proline'	-0.0889947	0.575816			874	'Sedoheptulose 1,7-bisphosphate'	-0.128472	0.643467
884	'D-Serine'	-0.0447716	0.177233		800	'L-Phenylalanine'	-0.177476	0.78028		875	'Sedoheptulose 7-phosphate'	-0.147071	0.88178			853	'Pyruvate'	-0.0339585	0.304018			875	'Sedoheptulose 7-phosphate'	-0.123104	0.274696
885	'L-Serine'	-0.0447716	0.177233		784	'Phosphoenolpyruvate'	-0.0449939	0.781142		884	'D-Serine'	-0.0434848	0.602604			874	'Sedoheptulose 1,7-bisphosphate'	-0.141689	0.405869			884	'D-Serine'	-0.0440168	0.72829
942	'L-Threonine'	-0.0770489	0.137079		834	'L-Proline'	-0.094273	0.710265		885	'L-Serine'	-0.0434848	0.602604			875	'Sedoheptulose 7-phosphate'	-0.140518	0.283157			885	'L-Serine'	-0.0440168	0.72829
977	'L-Tryptophan'	-0.212405	0.409676		853	'Pyruvate'	-0.0396375	0.154027		903	'Succinate'	-0.0392424	0.565269			884	'D-Serine'	-0.0386424	0.830443			903	'Succinate'	-0.0568998	0.293959
985	'L-Tyrosine'	-0.170757	0.542704		874	'Sedoheptulose 1,7-bisphosphate'	-0.128197	0.713946		942	'L-Threonine'	-0.0742424	0.627274			885	'L-Serine'	-0.0386424	0.830443			942	'L-Threonine'	-0.0751507	0.77064
994	'UDP-N-acetyl-D-glucosamine'	-0.289454	0.214952		875	'Sedoheptulose 7-phosphate'	-0.122841	0.527968		955	'alpha,alpha''-Trehalose 6-phosphate'	-0.251363	0.402888			903	'Succinate'	-0.0386424	0			955	'alpha,alpha''-Trehalose 6-phosphate'	-0.211495	0.464093
1007	'UDPglucose'	-0.253012	0.165393		884	'D-Serine'	-0.0439226	0.7336		977	'L-Tryptophan'	-0.230151	0.319881			942	'L-Threonine'	-0.067917	0.636307			977	'L-Tryptophan'	-0.213643	0.89305
1026	'L-Valine'	-0.0947493	0.341111		885	'L-Serine'	-0.0439226	0.7336		985	'L-Tyrosine'	-0.191616	0.129268			955	'alpha,alpha''-Trehalose 6-phosphate'	-0.240051	0.467803			985	'L-Tyrosine'	-0.170341	0.306416
352	'Citrate'	-0.0770489	0.396844		903	'Succinate'	-0.0567781	0.515201		1003	'UDP'	-0.161566	0.222174			977	'L-Tryptophan'	-0.218974	0.313766			1003	'UDP'	-0.150659	0.20613
500	'Fumarate'	-0.0520601	0.468688		942	'L-Threonine'	-0.0749899	0.52433		994	'UDP-N-acetyl-D-glucosamine'	-0.323838	0.523498			985	'L-Tyrosine'	-0.177989	0.516609			994	'UDP-N-acetyl-D-glucosamine'	-0.291298	0.410805
665	'L-Malate'	-0.0520601	0.624128		955	'alpha,alpha''-Trehalose 6-phosphate'	-0.211043	0.340482		1007	'UDPglucose'	-0.296262	0.342694			1003	'UDP'	-0.153399	0.198238			1007	'UDPglucose'	-0.254797	0.0899897
903	'Succinate'	-0.0562249	0.290051		977	'L-Tryptophan'	-0.213186	0.691119		1014	'UMP'	-0.146717	0.255788			994	'UDP-N-acetyl-D-glucosamine'	-0.311481	0.256113			1014	'UMP'	-0.146365	0.218292
543	'D-Glutamate'	-0.0760077	0.398389		985	'L-Tyrosine'	-0.169977	0.724139		1025	'UTP'	-0.176414	0.54143			1007	'UDPglucose'	-0.281036	0.121298			1025	'UTP'	-0.154953	0.252301
544	'L-Glutamate'	-0.0760077	0.398389		1003	'UDP'	-0.150337	0.486459		1026	'L-Valine'	-0.0943938	0.660905			1014	'UMP'	-0.139347	0.387163			1026	'L-Valine'	-0.0934015	0.312347
541	'L-Glutamine'	-0.0801725	0.726909		994	'UDP-N-acetyl-D-glucosamine'	-0.290675	0.505223								1025	'UTP'	-0.167451	0.546615
252	'2-Oxoglutarate'	-0.0676781	1.40537		1007	'UDPglucose'	-0.254251	0.128848								1026	'L-Valine'	-0.0925076	0.25206
					1014	'UMP'	-0.146052	0.512044
					1025	'UTP'	-0.154622	0.529456
					1026	'L-Valine'	-0.0932017	0.290086

## Sheet: Figure 5C
LCMS								GCMS
	Delta M	Shadow Price	Metabolite Index	Metabolite Name					Delta M	Shadow Price	Metabolite Index	Metabolite Name
	-0.178457	0	796	'L-Methionine'					0.0594329	2.3437	533	'D-Fructose'
	-0.178457	-0.178453	798	'L-Methionine'					-0.64505	0	597	'Glycerol'
	-0.0953903	0	796	'L-Methionine'					-0.541512	-0.0765	595	'Glycerol-3-phosphate'
	-0.0953903	-0.178453	798	'L-Methionine'					0.0561431	0	1128	'Trehalose'
	0.073249	0	614	'Reduced-glutathione'					-0.325292	0	1077	'Succinate'
	-0.0101958	0	614	'Reduced-glutathione'					-0.159814	10.3819	115	'3-Phospho-D-glycerate'
	0.186523	0	276	'AMP'					-0.659771	10.9826	304	'L-Aspartate'
	0.155069	0	276	'AMP'					-0.659771	10.9826	305	'L-Aspartate'
	0.536562	0	846	'Nicotinamide-adenine-dinucleotide--reduced'					-0.646363	9.73779	1052	'L-Serine'
	0.536562	0	847	'Nicotinamide-adenine-dinucleotide--reduced'					-0.646363	9.55934	1054	'L-Serine'
	0.536562	0	848	'Nicotinamide-adenine-dinucleotide--reduced'					-0.429932	6.08321	743	'D-Lactate'
	0.534777	0	846	'Nicotinamide-adenine-dinucleotide--reduced'					-0.429932	5.90476	745	'D-Lactate'
	0.534777	0	847	'Nicotinamide-adenine-dinucleotide--reduced'					-0.0621565	2.5796	545	'D-Glucose-6-phosphate'
	0.534777	0	848	'Nicotinamide-adenine-dinucleotide--reduced'					-1.63308	1.06221	591	'Glycine'
	0.584963	0	1038	'Riboflavin'					-1.63308	0.883753	593	'Glycine'
	-0.76275	0	1038	'Riboflavin'					0.416669	-1.6977	291	'L-Arginine'
	0.141698	0	382	'L-Carnitine'					0.416669	-1.87615	293	'L-Arginine'
	0.100929	0	618	'Guanine'					-0.50726	10.4777	1023	'Pyruvate'
	0.368645	0	618	'Guanine'					-0.50726	10.2993	1025	'Pyruvate'
	0.321928	0	1020	'Pyridoxal-5-phosphate'					-0.593	-2.2048	989	'L-Proline'
	0.178538	0	1020	'Pyridoxal-5-phosphate'					-0.143239	3.25459	535	'Fumarate'
	0.432315	0	859	'Nicotinamide'					-0.143239	4.87408	537	'Fumarate'
	0.263034	0	859	'Nicotinamide'					-0.414046	0	566	'D-Glucose'
	0.0630623	-1.6977	291	'L-Arginine'					-0.414046	0	567	'D-Glucose'
	0.0630623	-1.87615	293	'L-Arginine'					-0.414046	0	568	'D-Glucose'
	0.0521513	-1.6977	291	'L-Arginine'					-0.540568	7.14323	684	'L-Homoserine'
	0.0521513	-1.87615	293	'L-Arginine'					0.040642	0	1107	'Thiamine-diphosphate'
	-0.430435	1.88328	710	'L-Isoleucine'					-0.8422	-0.50569	906	'Ornithine'
	-0.168423	2.1937	948	'L-Phenylalanine'					-0.8422	-0.52271	908	'Ornithine'
	-0.0242475	2.1937	948	'L-Phenylalanine'					-0.509472	2.19333	538	'D-Glucose-1-phosphate'
	-0.066769	-2.2048	989	'L-Proline'					-0.525091	1.88328	710	'L-Isoleucine'
	0.0193653	-2.2048	989	'L-Proline'					-0.398415	1.5113	754	'L-Leucine'
	-0.0567548	9.73779	1052	'L-Serine'					-0.492114	10.0581	1110	'L-Threonine'
	-0.0567548	9.55934	1054	'L-Serine'					-0.492114	9.87968	1112	'L-Threonine'
	-0.24888	0	1181	'L-Tyrosine'					-0.36257	2.1937	948	'L-Phenylalanine'
	-0.320547	0	1181	'L-Tyrosine'					-0.211324	5.57467	257	'L-Alanine'
	-0.315139	1.5113	754	'L-Leucine'
	-0.177193	0.488114	578	'L-Glutamate'
	-0.15014	0.488114	578	'L-Glutamate'
	-0.231873	2.1937	1166	'L-Tryptophan'
	-0.231873	2.01525	1168	'L-Tryptophan'
	-0.305413	2.1937	1166	'L-Tryptophan'
	-0.305413	2.01525	1168	'L-Tryptophan'
	0.332575	-0.50569	906	'Ornithine'
	0.332575	-0.52271	908	'Ornithine'
	0.29956	-0.50569	906	'Ornithine'
	0.29956	-0.52271	908	'Ornithine'
	-0.201369	7.14323	684	'L-Homoserine'
	-0.281068	7.14323	684	'L-Homoserine'
	0.350332	0	522	'FMN'
	-0.117357	0	522	'FMN'
	-0.183849	0	214	'Acetyl-CoA'
	-0.0501235	0	214	'Acetyl-CoA'
	0.0916305	0	857	'Nicotinamide-adenine-dinucleotide-phosphate--reduced'
	0.561116	0	857	'Nicotinamide-adenine-dinucleotide-phosphate--reduced'
	-0.0684797	10.9826	298	'L-Asparagine'
	-0.0684797	10.9826	299	'L-Asparagine'
	-0.0684797	10.8042	300	'L-Asparagine'
	-0.121991	10.9826	298	'L-Asparagine'
	-0.121991	10.9826	299	'L-Asparagine'
	-0.121991	10.8042	300	'L-Asparagine'
	-0.399465	10.0581	1110	'L-Threonine'
	-0.399465	9.87968	1112	'L-Threonine'
